# Supplementary material
Source: PubMed Central journal article supplement (PMC2638828)
Supplement: ddn401_1.pdf [file ddn401_1.pdf]

# SUPPLEMENTARY MATERIAL

## SUPPLEMENTARY MATERIALS AND METHODS

### Generation of TP<sup>-/-</sup>UP<sup>-/-</sup> mice.

This work performed under a Columbia University Institutional Animal Care and Use Committee approved protocol.

To generate TP<sup>-/-</sup> (encoded by *Tymp* gene) mice, we initially amplified a 925-bp segment of the mouse *Tymp* transcript by RT-PCR (nts 457-1371 of NM\_13802.1). The RT-PCR product served as a template for a  $\alpha$ -<sup>32</sup>P dATP radiolabeled probe to screen hybridization filters spotted with a bacterial artificial chromosome (BAC) 129/SvJ genomic DNA library (Genome System Inc., St. Louis, MO). Two BACs (65d3 and 111d4) containing segments of the mouse *Tymp* genomic sequence were identified. From BAC 65d3 DNA, we subcloned a 5.4 kilobase (kb) fragment containing all 10 exons of *Tymp* and flanked by *Eco*RI and *Bgl*II restriction enzyme sites into a pUC18 vector, which had been digested with *Eco*RI and *Bam*HI, taking advantage of the compatible cohesive ends of *Bgl*II and *Bam*HI (Supplementary Material, Fig. S1).

To knockout the gene, we altered the plasmid targeting construct by introducing a DNA cassette comprised of a phosphoglycerate kinase promoter and neomycin resistance gene flanked by *LoxP* sites (PGK-Neo cassette, LPN) into a unique *PacI* site (converted from *NotI*) within the *Tymp* consensus sequence in exon 4 of the mouse *Tymp* gene. We electroporated the linearized plasmid DNA targeting construct into 129/SvJ mouse embryonic stem (ES) cells. Neomycin resistant clones were isolated and analyzed by PCR amplifications and Southern Blot analyses for homologous recombinants. To confirm 5'-end *Tymp* recombinations, we performed

PCR amplifications using a primer within PGK-Neo cassette sequence (PN-F5) paired with a primer in genomic DNA segments upstream of the targeting construct (PN-upst-2) (Fig. S1). ES cell clones that produced PCR amplified bands were screened further by Southern blot analyses using DNA digested with *SpeI* and probe B, which recognizes a genomic DNA segment downstream of the 3'-end of the targeting sequence but within fragments generated by the *SpeI* digestion; wild-type DNA produces a 12 kb band while homologous recombinant generate 5.7 kb band (Supplementary Material, Fig. S1). We performed a second PCR to confirm the 3'-end recombination using primers (PN-R4 and M22.2F4). We identified 22 ES cells clones harboring homologous recombinations. We submitted two ES clones (TP33 and TP90) to the Columbia University Transgenic Mouse Facility for injection into C57BL/6J blastocysts and obtained 12 pups (six from each ES clone). Using the previously described Southern blot analyses, we demonstrated that nine mice were chimeric (Supplementary Material, Fig. S1). Homologous recombinant in subsequent mice were confirmed by PCR amplifications; 23 of 47 (49%) F1 mice were heterozygous using PCR screening. We bred four pairs of F1 mice; the first two litters of F2 mice were comprised of four homozygous mutants, seven heterozygous and one wild-type. TP<sup>-/-</sup> mice did not show embryonic lethality and phenotypically similar to TP<sup>+/+</sup> mice.

Because murine UP degrades Thd and dUrd, we crossed UP<sup>-/-</sup> (encoded by *Upp1* gene) mice(1) with TP<sup>-/-</sup> mice to generate TP<sup>+/-</sup>UP<sup>+/-</sup> mice, followed by intercrossing the mice to generate TP<sup>-/-</sup>UP<sup>-/-</sup> mice. In all mice studied, the homologous recombination was confirmed by PCR amplifications (Supplementary Material, Fig. S1).

## SUPPLEMENTARY TABLES

**Table S1. Primers for mtDNA amplification and sequencing in brain**

| Fragment  | Forward Primer         | Reverse Primer         |
|-----------|------------------------|------------------------|
| <b>1</b>  | aggtttggtcctggccttat   | gtgaggtagagcggggtta    |
| <b>2</b>  | taaaccgctctacctcac     | catctttcccttgcggtact   |
| <b>3</b>  | agtaccgcaagggaaagatg   | tgtgtatgcctggagaattaga |
| <b>4</b>  | tctaattctccaggcatacaca | agctccatagggtcttctcg   |
| <b>5</b>  | aagacgagaagaccctatggag | tgtccttctgactgggaga    |
| <b>6</b>  | tctcccagtacgaaaggaca   | ctgataggctggatgttgct   |
| <b>7</b>  | tcccctaccaataccacacc   | gtggataggatgctcggatt   |
| <b>8</b>  | aatccgagcatcctatccac   | gaggctgttgcttgtgtgac   |
| <b>9</b>  | acacaagcaacagcctcaat   | tggaagacctcctagggatag  |
| <b>10</b> | cctaggaggcttccaccac    | tcggcggtagaagtagattg   |
| <b>11</b> | tctacttctaccgccgaaa    | acaccccagctaaatgaagg   |
| <b>12</b> | ccttcatttagctgggggtg   | cgatgtcaagggatgagttg   |
| <b>13</b> | tgggagcagtgtttgctatc   | atgtggcgtctttagacca    |
| <b>14</b> | tggctacaagacgccacat    | tctggtcggtttgatgta     |
| <b>15</b> | taacatcaaaccgaccagga   | tagggttcatgtccgtcctt   |
| <b>16</b> | ggacggacatgaaccctaat   | gagcaggccaagggtaata    |
| <b>17</b> | tattaacccttggcctgctc   | ggctcaaataccgaagtgat   |
| <b>18</b> | ccgcagcatgatactgacat   | ggtgggagcgaaatataagtg  |
| <b>19</b> | ttcgctcccacctaataatcc  | ttgggattaaggttgcttca   |
| <b>20</b> | tgaagcaaccttaatccaac   | gtgatgatgtgaggccatgt   |
| <b>21</b> | acatggcctcacatcatcac   | caccaaggttttggttcct    |
| <b>22</b> | aggaacaaaaaccttgggtg   | ccgatgcggttatagaggat   |

|           |                       |                      |
|-----------|-----------------------|----------------------|
| <b>23</b> | ctataaccgcatcggagaca  | ttttcggatgtctgttcg   |
| <b>24</b> | ctggcagacgaacaagacat  | taatgcggtgaatgatggat |
| <b>25</b> | atccatcattcaccgcatta  | ggatgttggtgtgtttgga  |
| <b>26</b> | tccaaacacaaccaacatcc  | ccgacatgaaggaataagca |
| <b>27</b> | attcctcatgtcggacgag   | attggggattgagcgtagaa |
| <b>28</b> | ccccatattaaccggaatg   | tgcttatatgctggggaaa  |
| <b>29</b> | ttcccaagcatataagcaa   | gccttaggtgattgggttt  |
| <b>30</b> | cacagtctagacgcacctacg | gtgtggctaggcaaggtgt  |

**Table S2. Primers for mtDNA amplification and sequencing in muscle and small intestine**

| Fragment | Forward Primer         | Reverse Primer         |
|----------|------------------------|------------------------|
| ND3-1    | ccgcagcatgatactgacat   | tgaattgctcatggtagtga   |
| ND3-2    | ttcgaccctacaagctctgc   | aagaaggtagatggcatattgg |
| ND6-1    | caaccaacaaaaaggctta    | gggggatgttggtgtgttt    |
| ND6-2    | accaatctcccaaaccatca   | gtcgcagttgaatgcgtgt    |
| D-Loop-1 | cagcacccaaagctggtatt   | caaatggggaaggggatagt   |
| D-Loop-2 | actatccccttcccatttg    | gccttgacggctatggtgat   |
| D-Loop-3 | ttagtccgcaaaacccaatc   | tttgggtccggaacatga     |
| D-Loop-4 | actatccccttcccatttg    | tttgggtccggaacatga     |
| D-Loop-5 | cagcacccaaagctggtatt   | gccttgacggctatggtgat   |
| Cytb-1   | actgcgaccaatgacatgaa   | ctcgtccgacatgaaggaat   |
| Cytb-2   | acgcaaacggagcctcaata   | ctgttctgaggaggaagagg   |
| Cytb-3   | catttattatcgcgcccta    | ggcttcgtgcttgaggta     |
| Ciytb-4  | aggaggtgtcctagccttaatc | aataccagcttgggtgctg    |
| RO       | tctacttctaccgccgaaaa   | tggtgagtaagcattagactg  |

**Table S3. Primers for DNA amplification in the SSCP analysis**

| Fragment | Forward Primer       | Reverse Primer         | Amplicon size |
|----------|----------------------|------------------------|---------------|
| ND3-1    | ccgcagcatgatactgacat | gggggagctagaatgcaac    | 219 bp        |
| ND3-2    | gcattctgactcccccaat  | tgaattgctcatggtagtga   | 179 bp        |
| ND3-3    | tccactacctgagcaattca | aagaaggtagatggcatattgg | 218 bp        |
| ND6-1    | caaccaaccaaaaaggctta | tgatggttgggagattggt    | 250 bp        |
| ND6-2    | accaatctcccaaaccatca | gggggatgttggtgtgttt    | 188 bp        |
| ND6-3    | tccaaacacaaccaacatcc | gtcgcagttgaatgcgtgt    | 242 bp        |
| D-Loop-1 | cagcacccaaagctggtatt | caaatggggaaggggatagt   | 295 bp        |
| D-Loop-2 | actatcccctccccatttg  | gtagggcgataacgcattt    | 175 bp        |
| D-Loop-3 | aatgcggtatcgcccatac  | gattgggtttgcggactaa    | 211 bp        |
| D-Loop-4 | ttagtccgcaaaaccaatc  | ttttggttccggaacatga    | 258 bp        |
| Cytb-1   | attgactacctgccccatc  | ctcgtccgacatgaaggaat   | 247 bp        |
| Cytb-2   | actgcgaccaatgacatgaa | gatggggcaggtaggatcaat  | 129 bp        |
| RO       | tctactctaccgccgaaaa  | tggtgagtaagcattagactg  | 164 bp        |

## SUPPLEMENTARY FIGURES AND LEGENDS TO FIGURES

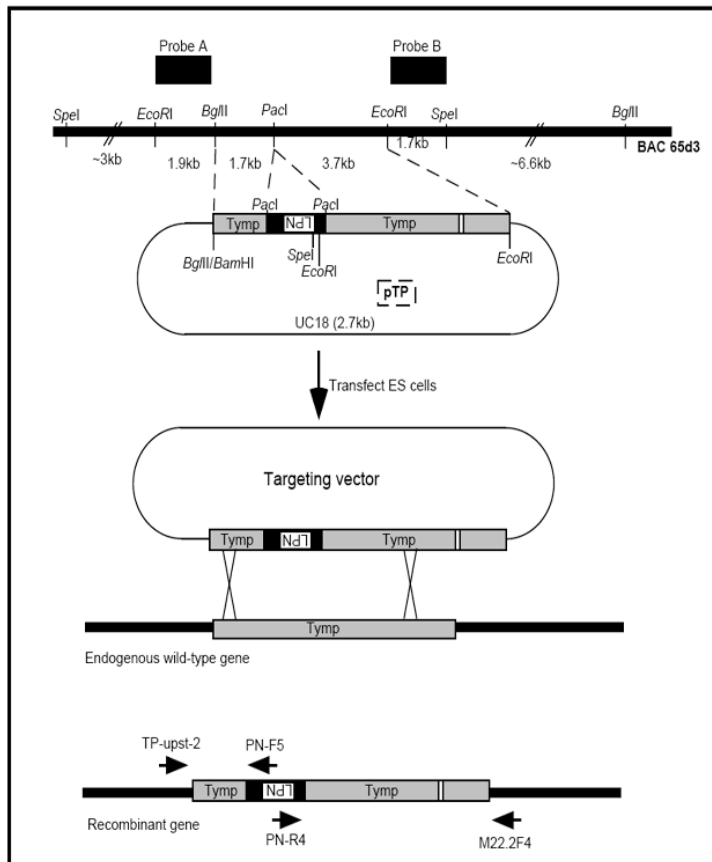

**Fig. S1.** Strategy to knock-out the mouse *TYMP* gene encoding thymidine phosphorylase. We isolated a 5.4 kb mouse genomic fragment that contains all 10 exons of the *TYMP* gene. This genomic fragment was sub-cloned into pUC18 vector. Within this vector, a unique *NotI* site in the mouse *TYMP* consensus sequence was identified. The *NotI* site was converted into a *Pacl* site, into which a PGK-neomycin cassette was inserted. We use this vector construct as a replacement vector to insert the disrupted *Tymp* gene into male 129/SvJ ES cells. Recombinants were identified by a combination of PCR and Southern blot screening.

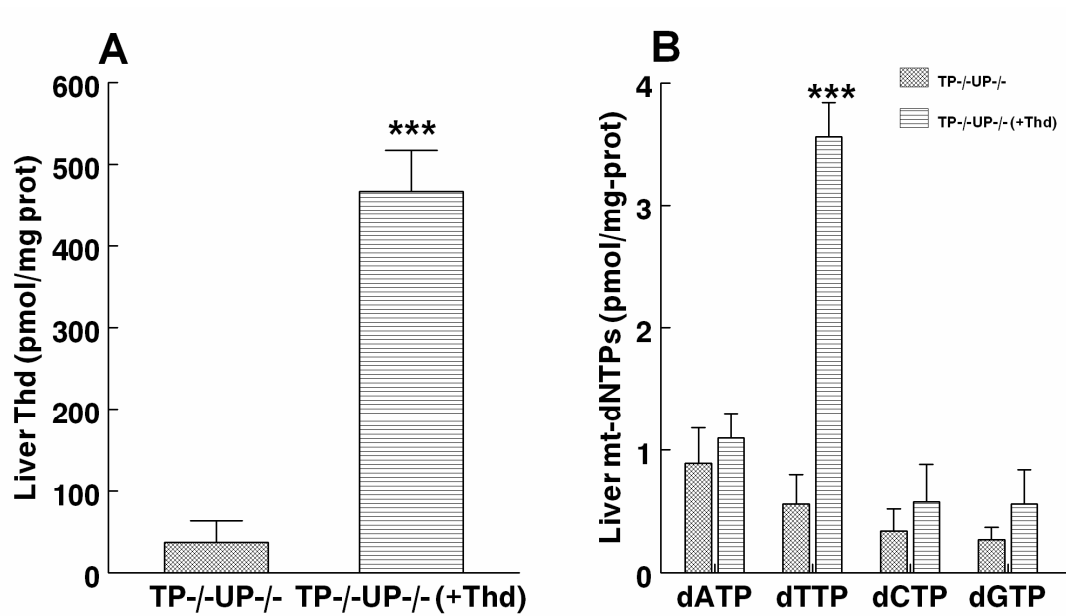

**Fig. S2.** Contribution of thymidine to the dNTPs pool unbalance. Liver Thd levels (A) and relative amount of dNTPs (B) 20 min after intraperitoneal injection of 100 mg Thd/kg b.w. Thd levels were measured in the whole tissue homogenates after sample deproteinization by HPLC with UV detection as described in the Material and Methods section. Mitochondrial dNTPs were measured in mitochondrial extracts by the radiolabeled polymerase assay described in material and methods section. All mice were sacrificed between 14-18 months old. Data are expressed as mean  $\pm$  SD of 5 mice per group. \*\*\*  $P < 0.001$  vs. TP<sup>+/+</sup>UP<sup>+/+</sup>.



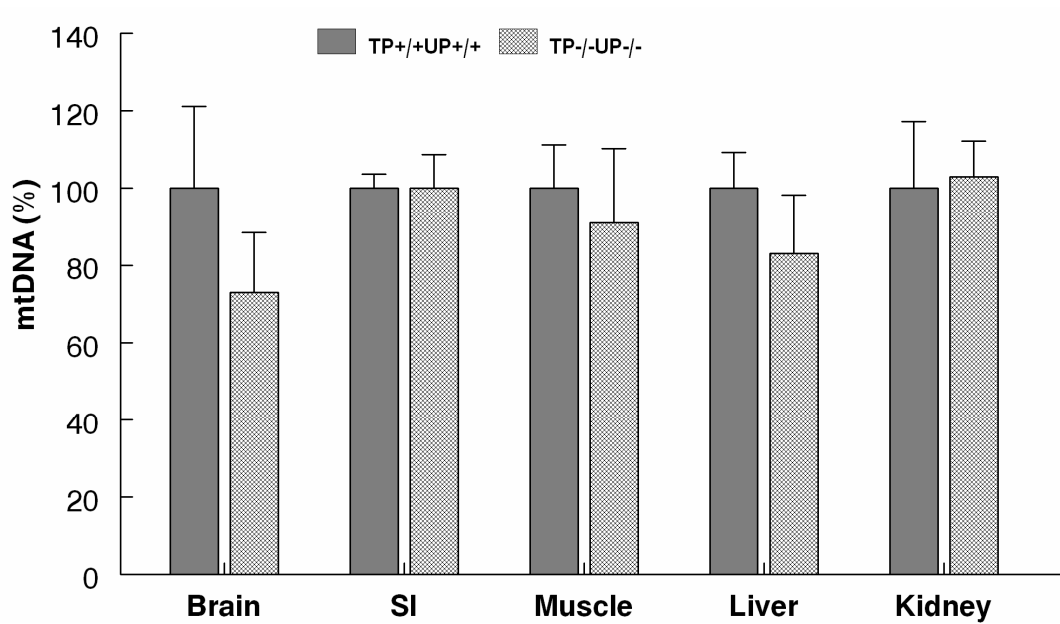

**Fig. S3.** Levels of mtDNA in 6-month-old relative to wild-type mice. Real time PCR was used to detect mtDNA and nDNA. Data are expressed as mean  $\pm$  SD of 5 mice per group.

#### SUPPLEMENTARY REFERENCES

1. Cao, D., Leffert, J. J., McCabe, J., Kim, B. & Pizzorno, G. (2005) *J Biol Chem* **280**, 21169-75.
